# Supplementary material
Source: ML conference proceedings conference paper supplement (https://openreview.net/forum?id=tQWv_iHyvT1)

# Real space

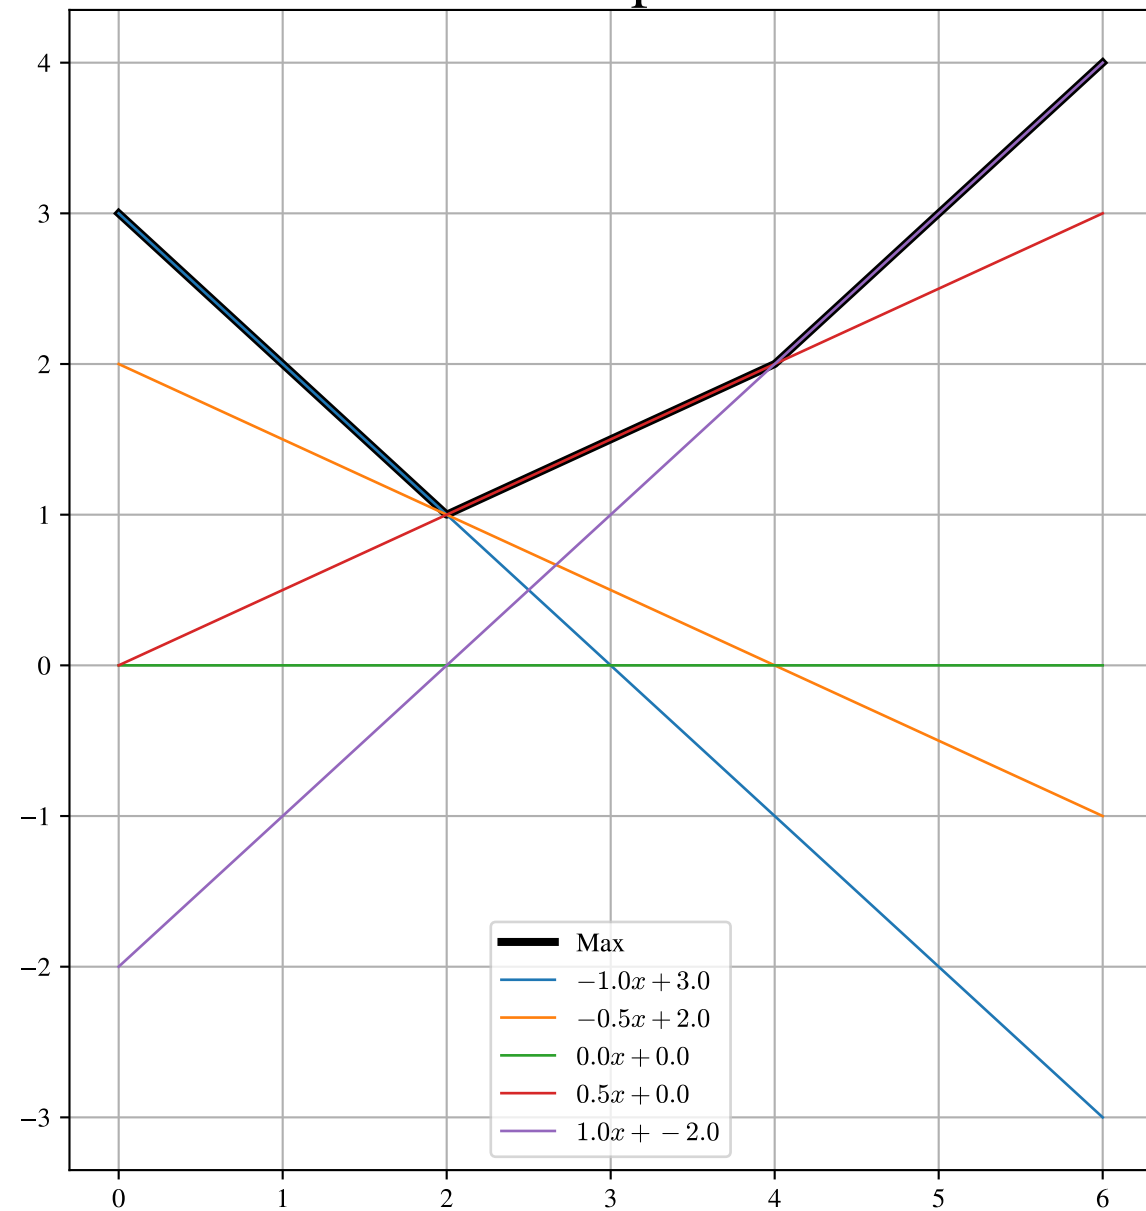

# Dual space

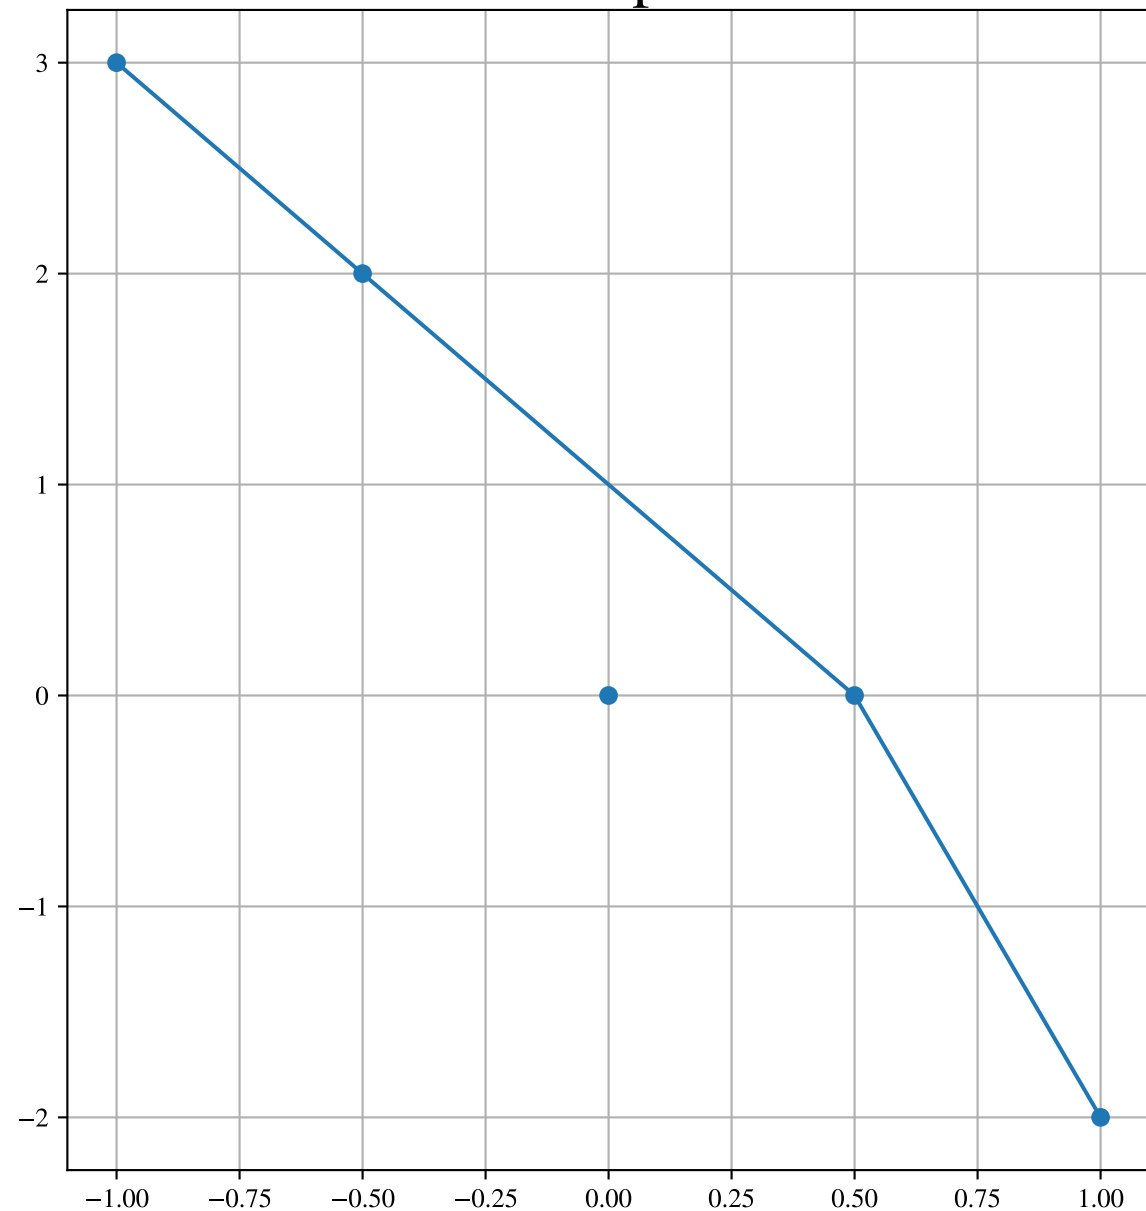

Supplement: supplementary_material [file attachment]

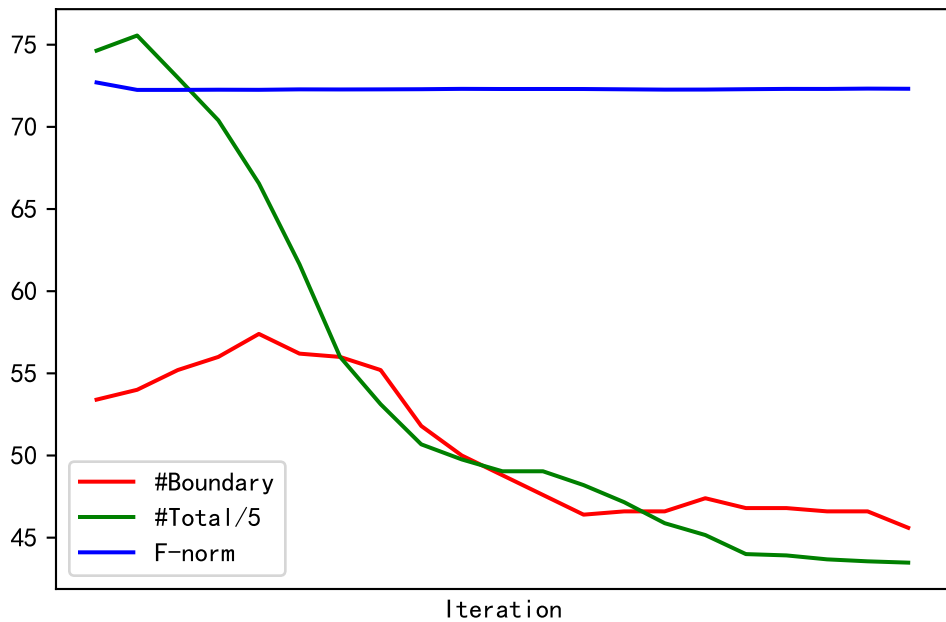

Supplement: supplementary_material [file attachment]

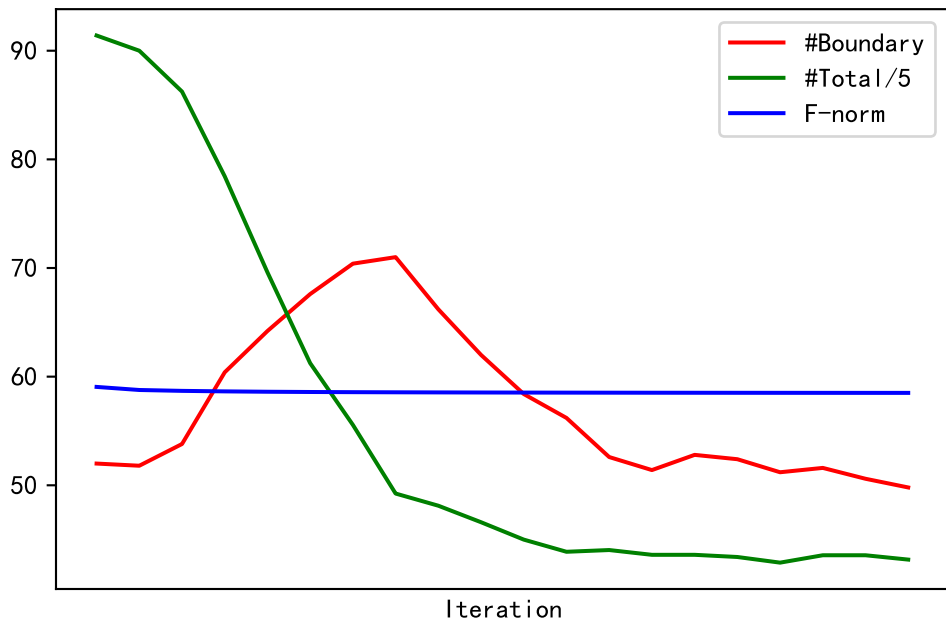

Supplement: supplementary_material [file attachment]

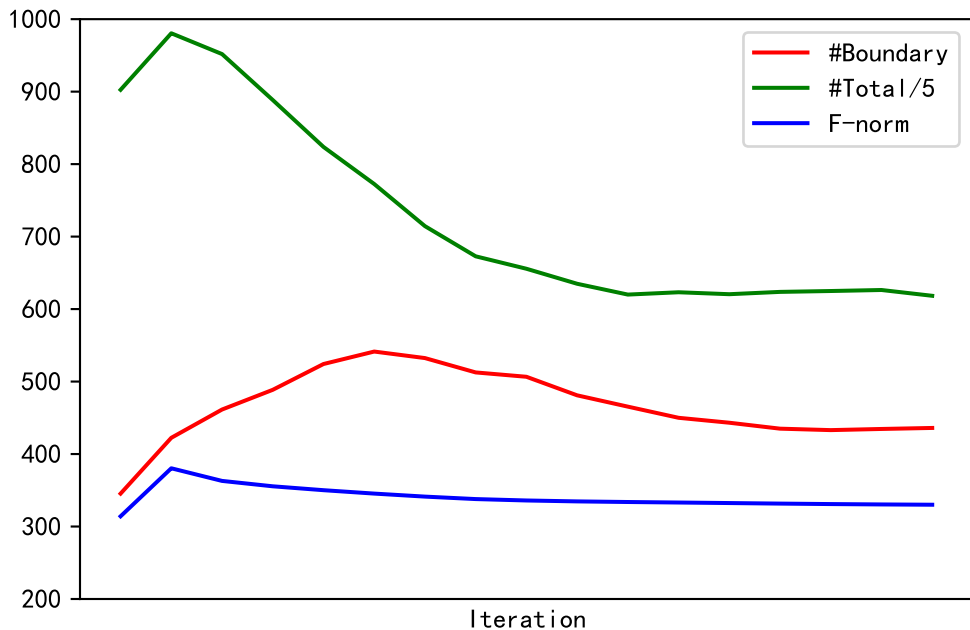

Supplement: supplementary_material [file attachment]

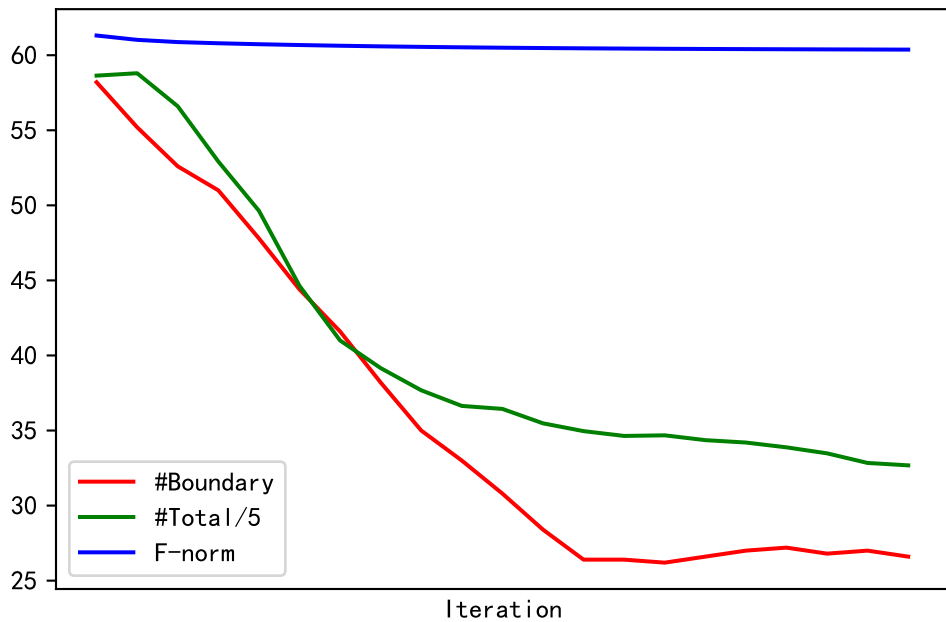

Supplement: supplementary_material [file attachment]

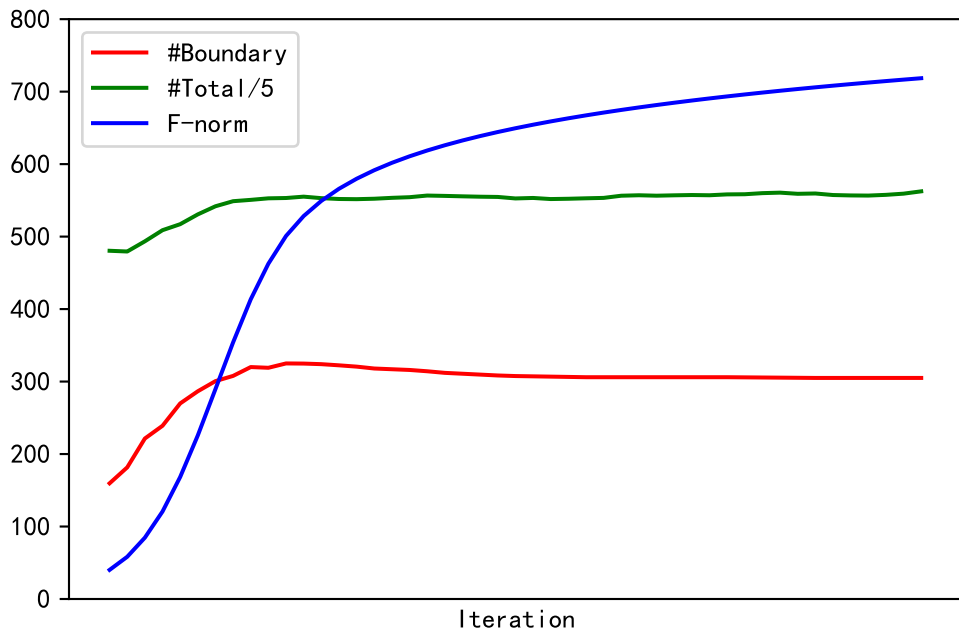

Supplement: supplementary_material [file attachment]
